# Supplementary material for: Thioacylsulfanylarsines (RCS2)xAsPh3 − x, x = 1–3: synthesis, structures, natural bond order analyses and reactions with piperidine †
Source: Royal Society of Chemistry journal article supplement (doi:10.1039/b008702p), 2001-01-01
Supplement: b008702p.doc [file b008702p.doc]

**Spectroscopic Data**

**(Thioacetylthio)diphenylarsine****3a.** Yellow crystals (34%): mp 102–104 °C; max/cm-1 (C=S) 1196 (KBr); **H(CDCl3) 2.79 (s, 3H, CH3), 7.18–7.30 (m, 6H), 7.39–7.51 (m, 4H); **C(CDCl3)36.3 (CH3), 128.7, 129.1, 133.1, 137.6, 233.6 (C=S).

**(Thiopropanoylthio)diphenylarsine 3b.** Orange oil (86%): max/cm-1 (C=S) 1179 (neat); **H(CDCl3) 1.33 (t, *J* = 7.3 Hz, 3H, CH3), 3.05 (q, *J* = 7.3 Hz, 2H, CH2), 7.27–7.29 (m, 6H), 7.47–7.49 (m, 4H); **C(CDCl3)15.4 (CH3), 46.6 (CH2), 128.7, 129.3, 133.0, 137.6, 243.0 (C=S).

**(2-Methylthiopropanoylthio)diphenylarsine 3c.** Orange oil (87%): max/cm-1 (C=S) 1198 (neat); **H(CDCl3) 1.31 (d, *J* = 6.7 Hz, 6H, CH3), 3.50 (sept, *J* = 6.7 Hz, 1H, CH), 7.26–7.29 (m, 6H), 7.46–7.49 (m, 4H); **C(CDCl3)24.3 (CH3), 51.0 (CH), 128.6, 129.2, 132.9, 137.6, 248.7 (C=S).

**Diphenyl(thiobenzoylthio)arsine 3d.** Red purple crystals (84%): mp 82–84 °C (Calc. for C19H15AsS2: C, 59.68; H, 3.95. Found: C, 59.59; H, 4.06%): max/cm-1 (C=S) 1218 (KBr); max/nm (CH2Cl2) 307 (/dm3 mol-1 cm-1 15 900), 527 (170); **H(CDCl3)7.32–7.49 (m, 8H), 7.51–7.86 (m, 7H); **C(CDCl3)128.1, 128.5, 128.8, 129.4, 133.1, 133.5, 137.9, 138.3, 229.0 (C=S).

**(4-Methylthiobenzoylthio)diphenylarsine 3e.** To a solution of piperidinium 4-methylbenzenecarbodithioate (0.269 g, 1.06 mmol) in CH2Cl2 (15 mL) was added Ph2AsCl (0.264 g, 1.00 mmol) in CH2Cl2 (5 mL), and the mixture was stirred at 20 °C for 1 h. After addition of CH2Cl2 (100 mL), the mixture was washed with water (3 x 90 mL), followed by drying on MgSO4 (ca. 2 g) for 1 h. The solvent was removed under reduced pressure by the use of a rotary evaporator (30 °C / 2.7 kPa). The resulting residue was dissolved into ether (5 mL), followed by allowing to stand in a refrigerator (-20 °C) for 24 h to give **3e** as red crystals 0.358g (91%): mp 85–87 °C (Calc. for C20H17AsS2: C, 60.60; H, 4.32. Found: C, 60.50; H, 4.36%): max/cm-1 (C=S) 1227 (KBr); max/nm (CH2Cl2) 330 (/dm3 mol-1 cm-1 17 000), 527 (170); **H(CDCl3)2.22 (s, 3H, CH3), 7.03 (d, *J* = 8.1 Hz, 2H), 7.24–7.27 (m, 6H), 7.49–7.53 (m, 4H), 8.06 (d, *J* = 8.1 Hz, 2H); **C(CDCl3)21.4 (CH3), 127.1, 128.6, 128.6, 129.2, 133.0, 137.9, 141.9, 143.6, 227.8 (C=S).

**(2-Methoxythiobenzoylthio)diphenylarsine 3f.** Red crystals (94%): mp 62–65 °C (Calc. for C20H17AsOS2: C, 58.25; H, 4.16. Found: C, 58.37; H, 4.22%): max/cm-1 (C=S) 1251 (KBr); **H(CDCl3) 3.66 (s, 3H, CH3O), 6.77–6.84 (m, 2H), 7.20–7.25 (m, 8H), 7.50–7.52 (m, 4H); **C(CDCl3)55.6 (CH3O), 111.6, 120.0, 128.5, 128.8, 129.1, 131.4, 132.8, 136.7, 137.6, 154.4, 230.5 (C=S).

**(4-Methoxythiobenzoylthio)diphenylarsine 3g.** Red purple crystals (94%): mp 115–117 °C (Calc. for C20H17AsOS2: C, 58.25; H, 4.16. Found: C, 58.48; H, 4.27%): max/cm-1 (C=S) 1264 (KBr); max/nm (CH2Cl2) 351 (/dm3 mol-1 cm-1 20 900), 518 (300); **H(CDCl3)3.80 (s, 3H, CH3O), 6.80 (d, *J* = 8.9 Hz, 2H), 7.28–7.34 (m, 6H), 7.54–7.56 (m, 4H), 8.22 (d, *J* = 8.9 Hz, 2H); **C(CDCl3)55.5 (CH3O), 113.3, 128.7, 129.3, 129.6, 133.2, 137.9, 138.2, 163.9, 226.2 (C=S).

**(4-Chlorothiobenzoylthio)diphenylarsine 3h.** Red purple crystals (88%): mp 69–72 °C (Calc. for C19H14AsClS2: C, 54.75; H, 3.39. Found: C, 55.01; H, 3.63%): max/cm-1 (C=S) 1224, 1213 (KBr); max/nm (CH2Cl2) 316 (/dm3 mol-1 cm-1 24 000), 533 (200); **H(CDCl3)7.29 (d, *J* = 8.7 Hz, 2H), 7.34–7.38 (m, 6H), 7.50–7.57 (m, 4H), 8.09 (d, *J* = 8.7 Hz, 2H); **C(CDCl3)128.3, 128.5, 128.9, 129.6, 133.2, 137.8, 139.3, 142.7, 227.0 (C=S).

**Diphenyl(1-thionaphthoylthio)arsine 3i.** Red crystals (92%): mp 170–175 °C (Calc. for C23H17AsS2: C, 63.88; H, 3.96. Found: C, 64.12; H, 3.66%): max/cm-1 (C=S) 1238 (KBr); max/nm (CH2Cl2) 290 (/dm3 mol-1 cm-1 20 900), 494 (450); **H(CDCl3) 7.23–7.30 (m, 8H), 7.33–7.41 (m, 1H), 7.52–7.70 (m, 5H), 7.72–7.74 (m, 2H), 8.22–8.24 (m, 1H); **C(CDCl3)123.8, 124.5, 125.1, 126.2, 126.8, 128.0, 128.8, 129.5, 129.9, 133.1, 133.5, 133.6, 137.5, 145.8, 233.4 (C=S).

**Bis(thioacetylthio)phenylarsine 4a.** Yellow crystals (15%): mp 105–109 °C; max/cm-1 (C=S) 1178 (KBr); **H(CDCl3)2.88 (s, 6H, CH3), 7.31–7.42 (m, 3H), 7.72–7.74 (m, 2H); **C(CDCl3)41.0 (CH3), 128.3, 129.0, 131.6, 133.6, 238.7 (C=S).

**Bis(thiopropanoylthio)phenylarsine 4b.** Red orange oil (76%): max/cm-1 (C=S) 1176 (neat); **H(CDCl3) 1.32 (t, *J* = 7.3 Hz, 6H, CH3), 3.03 (q, *J* = 7.3 Hz, 4H, CH2), 7.27–7.33 (m, 3H), 7.70–7.75 (m, 2H); **C(CDCl3)15.0 (CH3), 46.7 (CH2), 128.2, 129.6, 133.4, 139.6, 245.7 (C=S).

**Bis(2-methylthiopropanoylthio)phenylarsine 4c.** Red oil (84%): max/cm-1 (C=S) 1197 (neat); **H(CDCl3) 1.29 (d, *J* = 6.7 Hz, 12H, CH3), 3.40 (sept, *J* = 6.7 Hz, 2H, CH), 7.40–7.47 (m, 3H), 7.72–7.76 (m, 2H); **C(CDCl3)24.1 (CH3), 51.4 (CH), 128.4, 129.6, 133.3, 139.8, 251.7 (C=S).

**Bis(thiobenzoylthio)phenylarsine 4d.** Red orange crystals (67%): mp 119–122 °C (Calc. for C20H15AsS4: C, 52.39; H, 3.30. Found: C, 52.18; H, 3.26%): max/cm-1 (C=S) 1238, 1224 (KBr); max/nm (CH2Cl2) 315 (/dm3 mol-1 cm-1 34 700), 506 (500); **H(CDCl3)7.28–7.31 (m, 3H), 7.36 (t, *J* = 7.6 Hz, 4H), 7.54 (t, *J* = 7.6 Hz, 2H), 7.83–7.89 (m, 2H), 8.16 (d, *J* = 7.6 Hz, 4H); **C(CDCl3)127.0, 128.3, 128.4, 129.6, 133.4, 133.8, 140.6, 143.8, 231.0 (C=S).

**Bis(4-methylthiobenzoylthio)phenylarsine 4e.** Red crystals (70%): mp 183–185 °C (Calc. for C22H19AsS4: C, 54.31; H, 3.94. Found: C, 54.37; H, 4.00%): max/cm-1 (C=S) 1241 (KBr); max/nm (CH2Cl2) 333 (/dm3 mol-1 cm-1 40 000), 505 (660); **H(CDCl3)2.37 (s, 6H, CH3), 7.17 (d, *J* = 8.3 Hz, 4H), 7.29–7.34 (m, 3H), 7.87–7.89 (m, 2H), 8.10 (d, *J* = 8.3 Hz, 4H); **C(CDCl3)21.7 (CH3), 127.1, 128.3, 129.0, 129.4, 129.5, 133.8, 141.6, 144.7, 230.3 (C=S).

**Bis(2-methoxythiobenzoylthio)phenylarsine 4f.** Red orange crystals (83%): mp 105–107 °C (Calc. for C22H19AsO2S4: C, 50.96; H, 3.69. Found: C, 51.14; H, 3.79%): max/cm-1 (C=S) 1247 (KBr); **H(CDCl3) 3.81 (s, 6H, CH3O), 6.86–6.93 (m, 4H), 7.30–7.38 (m, 5H), 7.66–7.68 (m, 2H), 7.86–7.88 (m, 2H); **C(CDCl3)55.9 (CH3O), 112.0, 120.2, 128.2, 129.4, 129.9, 132.7, 133.3, 135.5, 140.1, 155.7, 231.4 (C=S).

**Bis(4-methoxythiobenzoylthio)phenylarsine 4g.** Red orange crystals (77%): mp 165–167 °C (Calc. for C22H19AsO2S4: C, 50.96; H, 3.69. Found: C, 50.99; H, 3.72%): max/cm-1 (C=S) 1265, 1240 (KBr); max/nm (CH2Cl2) 352 (/dm3 mol-1 cm-1 37 000), 498 (1 000); **H(CDCl3)3.84 (s, 6H, CH3O), 6.83 (d, *J* = 8.9 Hz, 4H), 7.27–7.32 (m, 3H), 7.87–7.90 (m, 2H), 8.23 (d, *J* = 8.9 Hz, 4H); **C(CDCl3)55.7 (CH3O), 113.4, 128.2, 129.4, 129.6, 133.8, 137.3, 141.5, 164.5, 228.1 (C=S).

**Bis(4-chlorothiobenzoylthio)phenylarsine 4h.** Red crystals (64%): mp 150–153 °C (Calc. for C20H13AsCl2S4: C, 45.55; H, 2.48. Found: C, 45.62; H, 2.55%): max/cm-1 (C=S) 1237 (KBr); max/nm (CH2Cl2) 326 (/dm3 mol-1 cm-1 39 000), 507 (900); **H(CDCl3)7.30–7.32 (m, 3H), 7.34 (d, *J* = 8.7 Hz, 4H), 7.84–7.87 (m, 2H), 8.10 (d, *J* = 8.7 Hz, 4H); **C(CDCl3)128.2, 128.4, 128.5, 129.8, 133.8, 140.2, 142.0, 228.9 (C=S).

**Bis(1-naphthoylthio)phenylarsine 4i.** Red orange crystals (83%): mp 113–118 °C (Calc. for C28H19AsS4: C, 60.20; H, 3.43. Found: C, 60.29; H, 3.57%): max/cm-1 (C=S) 1227 (KBr); max/nm (CH2Cl2) 292 (/dm3 mol-1 cm-1 32 000), 495 (620); **H(CDCl3) 7.41–7.49 (m, 9H), 7.61–7.63 (m, 2H), 7.82–7.89 (m, 4H), 7.96–7.98 (m, 2H), 8.16–8.18 (m, 2H); **C(CDCl3)124.5, 124.6, 125.2, 126.5, 127.2, 128.3, 128.6, 128.9, 130.1, 130.8, 133.7, 133.9, 139.4, 145.5, 235.4 (C=S).

**Tris(thioacethylthio)arsine 5a.** Red crystals (20%): mp 95–97 °C; max/cm-1 (C=S) 1194 (KBr); **H(CDCl3) 2.87 (s, 9H, CH3); **C(CDCl3)41.0 (CH3), 239.2 (C=S).

**Tris(thiopropanoylthio)arsine 5b.** Red oil (56%): max/cm-1 (C=S) 1174 (neat); **H(CDCl3) 1.38 (t, *J* = 7.3 Hz, 9H, CH3), 3.06 (q, *J* = 7.3 Hz, 6H, CH2); **C(CDCl3)14.8 (CH3), 46.8 (CH2), 250.1 (C=S).

**Tris(2-methylthiopropanoylthio)arsine 5c.** Yellow crystals (45%): mp 42–44 °C; max/cm-1 (C=S) 1202 (KBr); **H(CDCl3) 1.35 (d, *J* = 6.4 Hz, 18H, CH3), 3.41 (sept, *J* = 6.4 Hz, 3H, CH); **C(CDCl3)24.0 (CH3), 50.1 (CH), 256.2 (C=S).

**Tris(thiobenzoylthio)arsine 5d.** Red crystals (80%): mp 128–129 °C (Calc. for C21H15AsS6: C, 47.17; H, 2.83. Found: C, 46.86; H, 2.89%): max/cm-1 (C=S) 1241 (KBr); max/nm (CH2Cl2) 313 (/dm3 mol-1 cm-1 42 000), 511 (650); **H(CDCl3)7.29 (t, *J* = 7.9 Hz, 6H), 7.48 (t, *J* = 7.9 Hz, 3H), 8.10 (d, *J* = 7.9 Hz, 6H); **C(CDCl3)126.7, 128.1, 133.5, 143.0, 234.2 (C=S).

**Tris(4-methylthiobenzoylthio)arsine 5e.** Red crystals (78%): mp 68–70 °C (Calc. for C24H21AsS6: C, 49.98; H, 3.67. Found: C, 50.02; H, 3.74%): max/cm-1 (C=S) 1243, 1228 (KBr); max/nm (CH2Cl2) 330 (/dm3 mol-1 cm-1 42 000), 511 (800); **H(CDCl3)2.37 (s, 9H, CH3), 7.18 (d, *J* = 8.4 Hz, 6H), 8.10 (d, *J* = 8.4 Hz, 6H); **C(CDCl3)21.8 (CH3), 127.1, 129.8, 141.4, 145.1, 234.1 (C=S).

**Tris(2-methoxythiobenzoylthio)arsine 5f.** Orange crystals (74%): mp 72–74 °C (Calc. for C24H21AsO3S6: C, 46.14; H, 3.39. Found: C, 46.44; H, 3.52%): max/cm-1 (C=S) 1249 (KBr); **H(CDCl3) 3.83 (s, 9H, CH3O), 6.83–6.98 (m, 6H), 7.34–7.43 (m, 3H), 7.80–7.88 (m, 3H); **C(CDCl3)56.0 (CH3O), 111.9, 120.2, 129.4, 131.4, 135.9, 156.0, 236.2 (C=S).

**Tris(4-methoxythiobenzoylthio)arsine 5g.** Red crystals (82%): mp 128–129 °C (Calc. for C24H21AsO3S6: C, 46.14; H, 3.39. Found: C, 46.51; H, 3.66%): max/cm-1 (C=S) 1241 (KBr); max/nm (CH2Cl2) 355 (/dm3 mol-1 cm-1 74 000), 505 (1 300); **H(CDCl3)3.76 (s, 9H, CH3O), 6.76 (d, *J* = 9.0 Hz, 6H), 8.16 (d, *J* = 9.0 Hz, 6H); **C(CDCl3)55.5 (CH3O), 113.2, 129.2, 136.8, 164.5, 231.0 (C=S).

**Tris(4-chlorothiobenzoylthio)arsine 5h.** Orange crystals (86%): mp 140–145 °C (Calc. for C21H12AsCl3S6: C, 39.53; H, 1.90. Found: C, 39.46; H, 2.10%): max/cm-1 (C=S) 1229 (KBr); max/nm (CH2Cl2) 323 (/dm3 mol-1 cm-1 47 000), 510 (700); **H(CDCl3)7.37 (d, *J* = 8.8 Hz, 6H), 8.11 (d, *J* = 8.8 Hz, 6H); **C(CDCl3)128.6, 129.0, 140.8, 232.7 (C=S).

**Tris(1-thionaphthoylthio)arsine 5i.** Orange crystals (74%): mp 156–157 °C (Calc. for C33H21AsS6: C, 57.88; H, 3.09. Found: C, 57.58; H, 2.83%): max/cm-1 (C=S) 1223 (KBr); max/nm (CH2Cl2) 292 (/dm3 mol-1 cm-1 36 300), 500 (1 200); **H(CDCl3) 7.33–7.50 (m, 12H), 7.68–7.88 (m, 9H); **C(CDCl3)124.6, 124.8, 125.2, 126.0, 126.5, 127.0, 128.2, 131.3, 133.6, 145.1, 239.3 (C=S).

**(Acetylthio)diphenylarsine****6a.** Colorless oil (91%): max/cm-1 (C=O) 1682 (neat); **H(CDCl3) 2.43 (s, 3H, CH3), 7.31–7.34 (m, 6H), 7.50–7.52 (m, 4H); **C(CDCl3)32.2 (CH3), 128.7, 129.3, 133.0, 138.2, 195.9 (C=O).

**(2,2-Dimethylpropanoylthio)diphenylarsine****6b.** Yellow oil (88%): max/cm-1 (C=O) 1674 (neat); **H(CDCl3)1.29 (s, 9H, CH3), 7.32–7.35 (m, 6H), 7.52–7.54 (m, 4H); **C(CDCl3)22.8 (CH3), 47.6 (*C*CH3), 128.7, 129.2, 133.0, 138.5, 195.9 (C=O).

**(Benzoylthio)diphenylarsine 6c.** Colorless crystals (87%): mp 76–78 °C (Calc. for C19H15AsOS: C, 62.30; H, 4.13. Found: C, 62.67; H, 4.32%): max/cm-1 (C=O) 1644 (KBr); **H(CDCl3)7.34–7.39 (m, 6H), 7.43 (t, *J* = 7.8 Hz, 2H), 7.56 (t, *J* = 7.8 Hz, 1H), 7.59–7.62 (m, 4H), 8.07 (d, *J* = 7.8 Hz, 2H); **C(CDCl3)128.3, 128.5, 128.8, 129.4, 133.2, 133.5, 137.2, 138.4, 192.1 (C=O).

**(2-Methylbenzoylthio)diphenylarsine 6d.** Colorless crystals (87%): mp 63–67 °C (Calc. for C20H17AsOS: C, 63.16; H, 4.51. Found: C, 63.46; H, 4.72%): max/cm-1 (C=O) 1642 (KBr); **H(CDCl3)2.45 (s, 3H, CH3),7.20–7.34 (m, 8H), 7.55–7.59 (m, 4H), 7.93–7.97 (m, 2H); **C(CDCl3)C125.7, 128.8, 129.7, 129.9, 130.3, 132.0, 134.0, 136.2, 137.4, 138.1, 194.7 (C=O).

**(4-Methylbenzoylthio)diphenylarsine 6e.** To a solution of Ph2AsCl (0.271 g, 1.02 mmol) in CH2Cl2 (20 mL), potassium 4-methylbenzenecarbothioate (0.196 g, 1.03 mmol) was added and the mixture was stirred at 20 °C for 1 h. After addition of CH2Cl2 (100 mL), the mixture was washed with water (3 x 90 mL), followed by drying on MgSO4 (ca. 2 g) for 1 h. The solvents were removed under reduced pressure by the use of a rotary evaporator (30 °C / 2.7 kPa). The resulting residue was dissolved into a mixed solvent of CH2Cl2 (10 mL) and hexane (10 mL) and allowed to stand in a refrigerator (-20 °C) for 24 h to give **6e** as colorless crystals (0.358 g, 92%): mp 96–99 °C (Calc. for C20H17AsOS: C, 63.16; H, 4.51. Found: C, 62.95; H, 4.61%): max/cm-1 (C=O) 1644 (KBr); **H(CDCl3)2.39 (s, 3H, CH3), 7.21 (d, *J* = 8.1 Hz, 2H), 7.34–7.38 (m, 6H), 7.56–7.60 (m, 4H), 7.94 (d, *J* = 8.1 Hz, 2H); **C(CDCl3)21.7 (CH3), 128.4, 128.8, 129.2, 129.4, 133.2, 134.8, 138.5, 144.5, 191.7 (C=O).

**(2-Methoxybenzoylthio)diphenylarsine 6f.** Colorless crystals (89%): mp 94–96 °C (Calc. for C20H17AsO2S: C, 60.61; H, 4.32. Found: C, 60.73; H, 4.54%): max/cm-1 (C=O) 1621 (KBr); **H(CDCl3)3.82 (s, 3H, CH3O), 6.90–6.95 (m, 2H), 7.32–7.33 (m, 6H), 7.38–7.42 (m, 1H), 7.57–7.58 (m, 4H), 7.78–7.83 (m, 1H); **C(CDCl3)55.7 (CH3O), 112.0, 120.2, 128.5, 128.6, 129.1, 130.3, 133.1, 133.8, 138.5, 157.8, 190.8 (C=O).

**(4-Methoxybenzoylthio)diphenylarsine 6g.** Colorless crystals (87%): mp 42–44 °C (Calc. for C20H17AsO2S: C, 60.61; H, 4.32. Found: C, 60.55; H, 4.17%): max/cm-1 (C=O) 1629 (KBr); **H(CDCl3)3.84 (s, 3H, CH3O), 6.89 (d, *J* = 9.0 Hz, 2H), 7.33–7.36 (m, 6H), 7.60–7.64 (m, 4H), 8.02 (d, *J* = 9.0 Hz, 2H); **C(CDCl3)55.5 (CH3O), 113.7, 128.8, 129.3, 130.6, 132.4, 133.2, 138.6, 163.9, 190.5 (C=O).

**(4-Chlorobenzoylthio)diphenylarsine 6h.** Colorless crystals (91%): mp 94–96 °C (lit.,2c 87–88 °C) (Calc. for C19H14AsClOS: C, 56.95; H, 3.52. Found: C, 56.83; H, 3.58%): max/cm-1 (C=O) 1655 (KBr); **H(CDCl3)7.36–7.38 (m, 6H), 7.39 (d, *J* = 7.8 Hz, 2H), 7.56–7.60 (m, 4H), 7.99 (d, *J* = 7.8 Hz, 2H); **C(CDCl3)128.8, 128.9, 129.5, 129.6, 133.2, 135.6, 138.2, 140.0, 190.8 (C=O).

**(4-Nitrobenzoylthio)diphenylarsine 6i.** Yellow crystals (60%): mp 101–103 °C (Calc. for C19H14AsNO3S: C, 55.48; H, 3.43. Found: C, 55.75; H, 3.60%): max/cm-1 (C=O) 1655 (KBr); **H(CDCl3)7.39–7.41 (m, 6H), 7.57–7.59 (m, 4H), 8.18 (d, *J* = 8.0 Hz, 2H), 8.27 (d, *J* = 8.0 Hz, 2H); **C(CDCl3)123.8, 129.0, 129.2, 129.8, 133.2, 137.8, 141.7, 150.0, 190.8 (C=O).

**Bis(acetylthio)phenylarsine 7a.**  Yellow oil (91%): max/cm-1 (C=O) 1694 (neat); **H(CDCl3) 2.43 (s, 6H, CH3), 7.31–7.34 (m, 3H), 7.50–7.52 (m, 2H); **C(CDCl3) 32.1 (CH3), 128.7, 130.2, 132.2, 137.4, 196.3 (C=O).

**Bis(2,2-dimethylpropanoylthio)phenylarsine 7b.**  Yellow crystals (93%): mp 63–67 °C (Calc. for C16H23AsO2S2: C, 49.73; H, 6.00. Found: C, 49.82; H, 6.13%): max/cm-1 (C=O) 1672 (KBr); **H(CDCl3)1.23 (s, 18H, CH3), 7.26–7.42 (m, 3H), 7.67–7.80 (m, 2H); **C(CDCl3)27.6 (CH3), 47.6 (*C*CH3), 128.6, 130.0, 132.1, 138.4, 207.8 (C=O).

**Bis(benzoylthio)phenylarsine 7c.**  Colorless crystals (95%): mp 130–131 °C (lit.,2c 132–132 °C) (Calc. for C20H15AsO2S2: C, 56.34; H, 3.55. Found: C, 56.15; H, 3.41%): max/cm-1 (C=O) 1639 (KBr); **H(CDCl3)7.38–7.40 (m, 3H), 7.42 (t, *J* = 7.6 Hz, 4H), 7.56 (t, *J* = 7.6 Hz, 2H), 7.88–7.90 (m, 2H), 8.00 (d, *J* = 7.6 Hz, 4H); **C(CDCl3)128.3, 128.6, 128.9, 130.3, 132.5, 133.9, 136.6, 138.3, 192.8 (C=O).

**Bis(2-methylbenzoylthio)phenylarsine 7d.** Colorless crystals (43%): mp 75–77 °C (Calc. for C22H19AsO2S2: C, 58.15; H, 4.21. Found: C, 58.29; H, 4.10%): max/cm-1 (C=O) 1641 (KBr); **H(CDCl3)2.47 (s, 6H, CH3),7.20–7.25 (m, 4H), 7.36–7.47 (m, 5H), 7.88–7.90 (m, 2H), 7.94–7.96 (m, 2H); **C(CDCl3) C125.8, 128.8, 130.2, 130.3, 131.8, 132.3, 132.5, 136.7, 137.7, 138.2, 194.6 (C=O).

**Bis(4-methylbenzoylthio)phenylarsine 7e.** Colorless crystals (96%): mp 164–167 °C (Calc. for C22H19AsO2S2: C, 58.15; H, 4.21. Found: C, 58.03; H, 4.34%): max/cm-1 (C=O) 1626 (KBr); **H(CDCl3)2.38 (s, 6H, CH3), 7.21 (d, *J* = 8.2 Hz, 4H), 7.34–7.40 (m, 3H), 7.87–7.90 (m, 2H), 7.89 (d, *J* = 8.2 Hz, 4H); **C(CDCl3)21.7 (CH3), 128.4, 128.8, 129.2, 129.4, 133.2, 134.8, 138.5, 144.5, 192.4 (C=O).

**Bis(2-methoxybenzoylthio)phenylarsine 7f.** Colorless crystals (89%): mp 93–96 °C (Calc. for C22H19AsO4S2: C, 54.32; H, 3.94. Found: C, 54.40; H, 3.96%): max/cm-1 (C=O) 1606 (KBr); **H(CDCl3)3.87 (s, 6H, CH3O), 6.92–6.99 (m, 4H), 7.34–7.46 (m, 5H), 7.80–7.90 (m, 4H); **C(CDCl3)55.8 (CH3O), 112.0, 120.3, 126.1, 128.6, 129.8, 130.4, 132.4, 134.4, 138.9, 158.4, 191.3 (C=O).

**Bis(4-methoxybenzoylthio)phenylarsine 7g.** Colorless crystals (96%): mp 149–151 °C (Calc. for C22H19AsO4S2: C, 54.32; H, 3.94. Found: C, 54.04; H, 3.95%): max/cm-1 (C=O) 1628 (KBr); **H(CDCl3)3.82 (s, 6H, CH3O), 6.88 (d, *J* = 8.9 Hz, 4H), 7.34–7.41 (m, 3H), 7.87–7.90 (m, 2H), 7.97 (d, *J* = 8.9 Hz, 4H); **C(CDCl3)55.5 (CH3O), 113.7, 128.8, 129.5, 130.1, 130.6, 132.4, 138.7, 164.2, 191.1 (C=O).

**Bis(4-chlorobenzoylthio)phenylarsine 7h.** Colorless crystals (91%): mp 158–160 °C (Calc. for C20H13AsCl2O2S2: C, 48.50; H, 2.65. Found: C, 48.64; H, 2.58%): max/cm-1 (C=O) 1612 (KBr); **H(CDCl3)7.35–7.41 (m, 3H), 7.41 (d, *J* = 7.8 Hz, 4H), 7.85–7.88 (m, 2H), 7.94 (d, *J* = 7.8 Hz, 4H); **C(CDCl3)129.0, 129.0, 129.7, 130.6, 132.5, 135.0, 137.8, 140.5, 191.6 (C=O).

**Bis(4-nitrobenzoylthio)phenylarsine 7i.** Yellow crystals (44%): mp 104–106 °C (Calc. for C20H13AsN2O6S2: C, 46.52; H, 2.54. Found: C, 46.82; H, 2.69%): max/cm-1 (C=O) 1626 (KBr); **H(CDCl3)7.44–7.47 (m, 3H), 7.86–7.89 (m, 2H), 8.16 (d, *J* = 8.0 Hz, 4H), 8.29 (d, *J* = 8.0 Hz, 4H); **C(CDCl3)123.9, 129.2, 129.3, 131.0, 132.6, 136.8, 140.8, 150.8, 191.3 (C=O).

**Tris(acetylthio)arsine 8a.** Yellow oil (61%): max/cm-1 (C=O) 1694 (neat); **H(CDCl3) 2.47 (s, 9H, CH3); **C(CDCl3)32.1 (CH3), 196.4 (C=O).

**Tris(2,2-dimethylpropanoylthio)arsine 8b.** Colorless oil (66%): max/cm-1 (C=O) 1668 (neat); **H(CDCl3)1.26 (s, 27H, CH3); **C(CDCl3)27.5 (CH3), 47.7 (*C*CH3), 207.8 (C=O).

**Tris(benzoylthio)arsine****8c.** Colorless crystals (73%): mp 179–182 °C (lit.,9 155–157 °C) (Calc. for C21H15AsO3S3: C, 51.85; H, 3.11. Found: C, 51.35; H, 3.08%): max/cm-1 (C=O) 1631 (KBr) (lit.,9 1630 cm-1); **H(CDCl3)7.46 (d, *J* = 7.4 Hz, 6H), 7.60 (d, *J* = 7.4 Hz, 3H), 8.02 (d, *J* = 7.4 Hz, 6H); **C(CDCl3)128.5, 128.7, 134.2, 136.3, 193.0 (C=O).

**Tris(2-methylbenzoylthio)arsine 8d.** Colorless crystals (56%): mp 89–92 °C (lit.,9 80 °C) (Calc. for C24H21AsO3S3: C, 54.54; H, 4.00. Found: C, 54.42; H, 3.97%): max/cm-1 (C=O) 1637 (KBr) (lit.,9 1637 cm-1); **H(CDCl3)2.56 (s, 9H,

CH3),7.24–7.28 (m, 6H), 7.40–7.44 (m, 3H), 7.94–7.96 (m, 3H); **C(CDCl3)C125.9, 130.5, 131.9, 132.7, 136.2, 138.1, 194.7 (C=O).

**Tris(4-methylbenzoylthio)arsine 8e.** Colorless crystals (98%): mp 137–139 °C (lit.,9 128–130 °C) (Calc. for C24H21AsO3S3: C, 54.54; H, 4.00. Found: C, 54.29; H, 4.07%): max/cm-1 (C=O) 1639 (KBr) (lit.,9 1620 cm-1); **H(CDCl3)2.40 (s, 9H, CH3), 7.23 (d, *J* = 8.2 Hz, 6H), 7.80 (d, *J* = 8.2 Hz, 6H); **C(CDCl3)21.8 (CH3), 128.6, 129.4, 133.9, 145.3, 192.5 (C=O).

**Tris(2-methoxybenzoylthio)arsine 8f.** Colorless crystals (66 %): mp 150–155 °C (Calc. for C24H21AsO6S3: C, 50.00; H, 3.67. Found: C, 50.28; H, 3.89%): max/cm-1 (C=O) 1611 (KBr); **H(CDCl3)3.87 (s, 9H, CH3O), 6.95 (t, *J* = 7.6 Hz, 6H), 7.46 (t, *J* = 7.6 Hz, 3H), 7.86 (d, *J* = 7.6 Hz, 3H); **C(CDCl3)55.7 (CH3O), 112.0, 120.2, 125.3, 130.3, 134.8, 158.7, 191.4 (C=O).

**Tris(4-methoxybenzoylthio)arsine 8g.** Colorless crystals (86%): mp 94–96 °C (Calc. for C24H21AsO6S3: C, 50.00; H, 3.67. Found: C, 49.70; H, 3.84%): max/cm-1 (C=O) 1627 (KBr); **H(CDCl3)3.86 (s, 9H, CH3O), 6.90 (d, *J* = 8.7 Hz, 6H), 7.98 (d, *J* = 8.7 Hz, 6H); **C(CDCl3)55.6 (CH3O), 113.9, 129.3, 130.8, 164.4, 191.3 (C=O).

**Tris(4-chlorobenzoylthio)arsine 8h.** Colorless crystals (83%): mp 161–164 °C (Calc. for C21H12AsCl3O3S3: C, 42.77; H, 2.05. Found: C, 42.99; H, 1.92%): max/cm-1 (C=O) 1660 (KBr); **H(CDCl3)7.43 (d, *J* = 8.8 Hz, 6H), 7.94 (d, *J* = 8.8 Hz, 6H); **C(CDCl3)129.1, 129.8, 134.5, 141.0, 191.7 (C=O).

**Tris(4-nitrobenzoylthio)arsine 8i.** Yellow crystals (99%): mp 101–103 °C (Calc. for C21H12AsN3O9S3: C, 40.59; H, 1.95. Found: C, 41.72; H, 2.04%): max/cm-1 (C=O) 1625 (KBr); **H(CDCl3) 8.19 (d, *J* = 8.0 Hz, 6H), 8.34 (d, *J* = 8.0 Hz, 6H); **C(CDCl3)124.1, 129.5, 140.3, 151.1, 191.6 (C=O).
